# Supplementary material
Source: HighWire-hosted journal article supplement (http://jmg.bmjjournals.com/highwire/filestream/160738/field_highwire_adjunct_files/0/JMG_Sup_079343.pdf)
Supplement: JMG_Sup_079343.pdf [file JMG_Sup_079343.pdf]

**SUPPLEMENTARY MATERIALS****A 46,XX Cell Lineage with Maternal Uniparental Isodisomy for All Chromosomes in a Female with a Silver-Russell Syndrome-like Phenotype and a 45,X Turner Cell Lineage Accompanied by Biparentally Derived Autosomes**

**Kazuki Yamazawa,<sup>1,\*†</sup> Kazuhiko Nakabayashi,<sup>2,\*</sup> Masayo Kagami,<sup>1</sup> Tomoko Sato,<sup>1</sup>  
Shinji Saitoh,<sup>3</sup> Reiko Horikawa,<sup>4</sup> Naomi Hizuka,<sup>5</sup> Tsutomu Ogata<sup>1</sup>**

Departments of <sup>1</sup>Endocrinology and Metabolism, and <sup>2</sup>Maternal-Fetal Biology, National Research Institute for Child Health and Development, Tokyo, Japan; <sup>3</sup>Department of Pediatrics, Hokkaido University Graduate School of Medicine, Sapporo, Japan; <sup>4</sup>Division of Endocrinology and Metabolism, National Children's Hospital, Tokyo, Japan; <sup>5</sup>Department of Medicine, Institute of Clinical Endocrinology, Tokyo Women's Medical University, Tokyo, Japan

Correspondence to: Dr T Ogata, Department of Endocrinology and Metabolism, National Research Institute for Child Health and Development, 2-10-1 Ohkura, Setagaya, Tokyo 157-8535, Japan. Tel: +81-3-5494-7025; Fax: +81-3-5494-7026; E-mail: tomogata@nch.go.jp

\*These authors contributed equally to this work.

†Present address: Department of Physiology, Development & Neuroscience, University of Cambridge, Cambridge, UK

## SUPPLEMENTARY METHODS

### Primers

The primers for bisulfite-PCR assays utilized for genetic screenings for Silver-Russell syndrome are shown in supplementary table 1, those for bio-COBRA (combined bisulfite restriction analysis) assays for multiple DMRs (differentially methylated regions) are shown in supplementary table 2, and those for Y chromosome analysis are shown in supplementary table 3. The primers for genomewide microsatellite analysis were based on ABI PRISM Linkage Mapping Set v2.5-MD10 (Applied Biosystems, Foster City, California, USA), and loci with high heterozygosities in the Japanese population were examined.<sup>1</sup> The probe-primer mixtures for quantitative real-time reverse transcriptase PCR analysis were as follows (assay IDs): Hs01005963\_m1 for *IGF2*, Hs00256090\_m1 for *SNRPN*, Hs00414677\_m1 for *ZAC1*, Hs00399294\_g1 for *H19*, Hs00292028\_m1 for *MEG3*, Hs00169368\_m1 for *PHLDA2*, and Hs00175938\_m1 for *CDKN1C* (Applied Biosystems); the TATA box binding protein (*TBP*) and glyceraldehyde-3-phosphate dehydrogenase (*GAPDH*) were used as internal controls, using the Human TBP Endogenous Control and Human GAPDH Endogenous Control, respectively (Applied Biosystems).

**Supplementary Table 1.** Bisulfite-PCR primers utilized for genetic screenings for Silver-Russell syndrome

| DMR                                           | Nucleotide positions*   | Forward primer sequence (5' → 3') | AT  |
|-----------------------------------------------|-------------------------|-----------------------------------|-----|
|                                               |                         | Reverse primer sequence (5' → 3') | PS  |
| <i>H19</i> -DMR (A)                           | 1976042–1976360 (-)     | AACCCCTTCCTACCACCATC              | 60  |
|                                               |                         | GGGTTTGGGAGAGTTTGTGA              | 317 |
| <i>MEST</i> -DMR (A)<br>(methylated allele)   | 129919201–129919491 (+) | TAGTTGCGTTTCGTAAGGTAGTGTC         | 58  |
|                                               |                         | ACACAATCCTCCGCTCGCCTA             | 291 |
| <i>MEST</i> -DMR (A)<br>(unmethylated allele) | 129919254–129919492 (+) | GTTTGGTGTGGTGTGTTTGTGTGGG         | 60  |
|                                               |                         | CACACAATCCTCCACTCACCTACA          | 239 |

\*Nucleotide positions are based on the human reference sequence assembly (NCBI Build 36.1); The (+) and the (-) symbols after nucleotide positions indicate the DNA strand utilized to design PCR primers.

AT: Annealing temperature (°C), PS: product size (bp).

The primer sequences and PCR conditions for *H19*-DMR (A) and the *MEST*-DMR (A) (methylated allele) have been reported previously<sup>2,3</sup>, whereas those for the *MEST*-DMR (A) (unmethylated allele) are designed in this study.

**Supplementary Table 2.** Bisulfite-PCR primers and restriction enzymes utilized for bio-COBRA assays

| DMR                | Chromosome number<br>Nucleotide positions* | Forward primer sequence (5' → 3')<br>Reverse primer sequence (5' → 3') | AT<br>PS  | Enzyme†<br>Frag. size      |
|--------------------|--------------------------------------------|------------------------------------------------------------------------|-----------|----------------------------|
| <i>ARHI</i> -DMR   | Chromosome 1<br>68285331–68285550 (–)      | GGTTTTAAGGAATAGAAGTTGTTGA<br>AACCCAACAACCTAAACAATAAATATTTT             | 55<br>220 | <i>Bst</i> UI<br>122/62/36 |
| <i>NAP1L5</i> -DMR | Chromosome 4<br>89837763–89838003 (+)      | GGGGTTTTTTTAGTTATTTGATTAGT<br>AAAATCTCTCTAAACCAACTC                    | 55<br>241 | <i>Taq</i> I<br>154/65/22  |
| <i>ZAC1</i> -DMR   | Chromosome 6<br>144370901–144371052 (–)    | GGGGTAGTYGTGTTTATAGTTTAGTA<br>CRAACACCCAAACACCTACCCT                   | 62<br>152 | <i>Taq</i> I<br>91/61      |
| <i>GRB10</i> -DMR  | Chromosome 7<br>50817378–50817623 (+)      | GTTATATAATATTGTTTTATGGTTGG<br>GCTCTCCAAATACTCAAATAAACTCC               | 57<br>246 | <i>Taq</i> I<br>158/88     |
| <i>PEG10</i> -DMR  | Chromosome 7<br>94123783–94123981 (–)      | GGTTTTTTTATTGTTTTGGGGTATA<br>ATATAAAACCCCATCCTTCCTATCTT                | 57<br>199 | <i>Taq</i> I<br>106/93     |
| <i>MEST</i> -DMR‡  | Chromosome 7<br>129919303–129919521 (+)    | TYGTTGTTGGTTAGTTTTGTAYGGTT<br>CCCAAAAACAACCCCAACTC                     | 57<br>219 | <i>Taq</i> I<br>101/97/21  |
| <i>H19</i> -DMR‡   | Chromosome 11<br>1977615–1977893 (–)       | GAGTTYGGGGGTTTTTGTATAGT<br>TAAATAATACCCRACCTAAAAATCTAA                 | 60<br>279 | <i>Taq</i> I<br>142/137    |
| <i>IGF2</i> -DMR2  | Chromosome 11<br>2,110,802–2,111,138 (+)   | ATTGTTGGTTATTTTTGGGGG<br>AACTCAAATCACTAATCAATCACAAA                    | 57<br>337 | <i>Taq</i> I<br>242/95     |
| <i>LIT1</i> -DMR   | Chromosome 11<br>2677736–2678042 (+)       | TTTTGGTAGGATTTTGTGAGGAGT<br>CCTCACACCCAACCAATACCTC                     | 57<br>307 | <i>Bst</i> UI<br>255/52    |
| IG-DMR-CG4         | Chromosome 14<br>100345398–100345600 (+)   | AATTATTTTTGGATAAGAGAGTATA<br>ATTACAAACCAAAAATAAATAAATAAATC             | 57<br>203 | <i>Bst</i> UI<br>123/62/18 |
| <i>SNRPN</i> -DMR  | Chromosome 15<br>22751048–22751345 (+)     | AGGGAGTTGGGATTTTTGTATTG<br>CTCCCCAACTATCTCTTAAAAAAAACC                 | 57<br>240 | <i>Rsa</i> I<br>205/35     |
| <i>PEG3</i> -DMR   | Chromosome 19<br>62043541–62043862 (+)     | AAAAGGTATTAATTATTATAGTTTGGT<br>AAAAATATCCACCCTAAACTAATAA               | 57<br>322 | <i>Taq</i> I<br>206/116    |
| <i>MCTS2</i> -DMR  | Chromosome 20<br>29598611–29598909 (+)     | GTTAGAATTAATTTATTAGGGTG<br>AAATCCCCTACAAAAAACC                         | 57<br>299 | <i>Taq</i> I<br>172/127    |
| <i>NNAT</i> -DMR   | Chromosome 20<br>35582379–35582576         | ATTTTTTTGTATTTTTTTATAGATAT<br>ATTTTAAACCCAATCCTCTACTTC                 | 55<br>197 | <i>Mlu</i> I<br>153/44     |
| <i>L3MBTL</i> -DMR | Chromosome 20<br>41575924–41576143 (–)     | GGTTTAGTTAATTTTTATAGATATTGATT<br>ACCCTAAATATATCTTACTTTCCCC             | 57<br>220 | <i>Bst</i> UI<br>163/57    |
| <i>NESP55</i> -DMR | Chromosome 20<br>56848649–56848844 (+)     | GTTTTTTTGGTTTTTTTTGTTTTAT<br>AAACAACCTCAAATCTACCTCCTC                  | 57<br>196 | <i>Taq</i> I<br>147/49     |
| <i>NESPAS</i> -DMR | Chromosome 20<br>56859212–56859446 (+)     | AATTTGTGGTATGAGGAAGAGTGAT<br>TCAACCATTAAACAAAATCATACC                  | 57<br>235 | <i>Bst</i> UI<br>130/105   |
| <i>XIST</i> -DMR   | Chromosome X<br>72989197–72989403 (+)      | AAAATGTTTTAGAAAGAATTTTAAGTGTAG<br>AAATAAATTTTAAACCAACCAATCAC           | 57<br>207 | <i>Taq</i> I<br>147/60     |

\*Nucleotide positions are based on the human reference sequence assembly (NCBI Build 36.1); The (+) and the (–) symbols after nucleotide positions indicate the DNA strand utilized to design PCR primers.

†These enzymes digest methylated clones.

‡Note that the *MEST*-DMR examined with these primers is different from the *MEST*-DMR (A) examined with the primers shown in supplementary table 1; similarly, the *H19*-DMR examined with these primers contains the CTCF binding site 6 and is different from the *H19*-DMR (A) examined with the primers shown in supplementary table 1 that resides outside the CTCF binding sites.

AT: Annealing temperature (°C), PS: product size (bp); Y: C or T (pyrimidine) ; and R: A or G (purine).

The primer sequences have been designed by us, except for those for the following DMRs reported in the literature: the *ZAC1*-DMR,<sup>4</sup> the *MEST*-DMR, the *H19*-DMR,<sup>5</sup> the *LIT1*-DMR, the *SNRPN*-DMR,<sup>6</sup> and the *PEG3*-DMR.<sup>7</sup>

**Supplementary Table 3.** PCR primers and conditions utilized for sex chromosome analyses

| Locus              | Primer sequence (5' → 3')                   | AT | PS                   |
|--------------------|---------------------------------------------|----|----------------------|
| <i>PABY/PABX</i>   | GTACTACCTTTAGAAAAGTAGTATTTTCCC (Y-specific) | 54 | 950 ( <i>PABY</i> )  |
|                    | CTGCAGAAACAAGCTCATCAGCGTGACTAT (X-specific) |    | 771 ( <i>PABX</i> )  |
|                    | GAATTCTTAACAGGACCCATTTAGGATTAA (common)     |    |                      |
| <i>SRY</i>         | GAATATTCCCGCTCTCCGGA                        | 58 | 470                  |
|                    | GCTGGTGCTCCATTCTTGAGT                       |    |                      |
| <i>ZFY/ZFX</i>     | CATCTTTACAAGCTTGTAGACACACT (Y-specific)     | 62 | 340 ( <i>ZFY</i> )   |
|                    | GAACACACTACTGAGCAAAATGTATA (X-specific)     |    | 488 ( <i>ZFX</i> )   |
|                    | ATTTGTTCTAAGTCGCCATATTCTCT (common)         |    |                      |
| <i>AMELY/AMELX</i> | CTCTGATGGTTGGCCTCAAGCCTGT                   | 62 | 618 ( <i>AMELY</i> ) |
|                    | CACTGTCCCTCATCCTAGAAACACA                   |    | 804 ( <i>AMELX</i> ) |
| <i>DYS14</i>       | GGGCCAATGTTGTATCCTTCTC                      | 52 | 84                   |
|                    | GCCCATCGGTCACTTACACTTC                      |    |                      |
| <i>DYZ3</i>        | TCCTTTCCACAATAGACGTCA                       | 58 | 174                  |
|                    | GGAAGTATCTTCCCTTAAAAGCTATG                  |    |                      |

AT: annealing temperature (°C); and PS: product size (bp).

**Supplementary Table 4.** The results of microsatellite analysis

| Locus           | Mother  | Patient   | Brother | Locus             | Mother  | Patient   | Brother |
|-----------------|---------|-----------|---------|-------------------|---------|-----------|---------|
| <i>D1S238</i>   | 295/309 | 309       | 295/305 | <i>D13S170</i>    | 147/153 | 153/(163) | 143/147 |
| <i>D1S207</i>   | 148/166 | 166       | 164/166 | <i>D13S153</i>    | 93/107  | 93/(97)   | 97/107  |
| <i>D1S218</i>   | 275/277 | (269)/275 | 269/275 | <i>D14S72</i>     | 194/198 | 194/(198) | 198/200 |
| <i>D1S2841</i>  | 238/248 | 238/(248) | 238/248 | <i>D14S80</i>     | 98      | 98/(105)  | 98/103  |
| <i>D2S117</i>   | 196/208 | 208/(210) | 196/206 | <i>D14S608</i>    | 204/214 | 204/(218) | 214/218 |
| <i>D2S2330</i>  | 170/172 | 170/(172) | 172     | <i>D14S588</i>    | 118/126 | (114)/126 | 114/126 |
| <i>D2S2333</i>  | 95/99   | 99/(103)  | 95/101  | <i>D14S250</i>    | 161     | 161/(175) | 161/175 |
| <i>D2S367</i>   | 320/328 | 320/(328) | 328     | <i>D14S1010</i>   | 142/150 | (148)/150 | 142/148 |
| <i>D3S1580</i>  | 235     | 235       | 235/237 | <i>D14S1007</i>   | 111     | 111/(119) | 111/119 |
| <i>D3S1292</i>  | 120/124 | 120/(128) | 120/132 | <i>D15S205</i>    | 161/163 | 163/(165) | 157/163 |
| <i>D3S1566</i>  | 165/167 | 167       | 167/175 | <i>D15S1007</i>   | 88/90   | 88/(92)   | 90/92   |
| <i>D3S1263</i>  | 195/201 | 195/(205) | 201/215 | <i>D15S128</i>    | 205/211 | 205       | 205/211 |
| <i>D4S1535</i>  | 261     | 261       | 261/263 | <i>D16S515</i>    | 336/338 | (332)/338 | 332/336 |
| <i>D4S402</i>   | 113/137 | 113/(131) | 107/113 | <i>D16S3091</i>   | 175/181 | 181/(185) | 175/185 |
| <i>D4S1572</i>  | 206/210 | 206       | 206     | <i>D16S423</i>    | 136     | 136/(150) | 136/150 |
| <i>D4S392</i>   | 95/99   | 95/(101)  | 93/99   | <i>D17S928</i>    | 82/86   | 86/(88)   | 86/88   |
| <i>D5S400</i>   | 198/234 | 198/(234) | 228/234 | <i>D17S787</i>    | 145/155 | 155/(171) | 145/163 |
| <i>D5S644</i>   | 97/99   | (95)/99   | 95/99   | <i>D17S831</i>    | 116/118 | (112)/118 | 112/118 |
| <i>D5S407</i>   | 87/97   | (83)/97   | 83/87   | <i>D18S452</i>    | 125/129 | 125/(133) | 125/131 |
| <i>D6S281</i>   | 144/152 | 144/(152) | 144/152 | <i>D18S53</i>     | 170/172 | 170/(172) | 170/172 |
| <i>D6S289</i>   | 161     | 161       | 161     | <i>D18S61</i>     | 229     | (225)/229 | 225/229 |
| <i>D6S257</i>   | 177     | (175)/177 | 175/177 | <i>D19S220</i>    | 279     | (275)/279 | 275/279 |
| <i>D6S292</i>   | 150/158 | 158/(168) | 158/168 | <i>D19S209</i>    | 244/252 | (242)/244 | 242/244 |
| <i>D7S531</i>   | 249     | 249/(251) | 249/251 | <i>D19S226</i>    | 252/254 | (246)/254 | 246/254 |
| <i>D7S484</i>   | 100/102 | (98)/100  | 98/100  | <i>D20S196</i>    | 263/288 | 263/(285) | 263/285 |
| <i>D7S2846</i>  | 176     | 176       | 176     | <i>D20S117</i>    | 178/180 | 178/(180) | 180     |
| <i>D7S519</i>   | 264/266 | (262)/264 | 262/264 | <i>D20S186</i>    | 128/138 | (116)/128 | 116/138 |
| <i>D7S672</i>   | 132/148 | (136)/148 | 132/136 | <i>D21S266</i>    | 156/160 | (156)/160 | 156/160 |
| <i>D7S669</i>   | 124/130 | 124       | 124/130 | <i>D21S1256</i>   | 102/110 | (102)/110 | 102     |
| <i>D7S684</i>   | 179     | (167)/179 | 167/179 | <i>D21S1252</i>   | 162     | 162/(168) | 162/168 |
| <i>D7S1824</i>  | 169/173 | 173/(185) | 173/185 | <i>D22S274</i>    | 284/292 | 292       | 292     |
| <i>D7S550</i>   | 188     | (186)/188 | 186/188 | <i>D22S423</i>    | 298/308 | 298/(306) | 298/306 |
| <i>D8S284</i>   | 286/300 | 286       | 300/302 | <i>D22S315</i>    | 195/197 | (195)/197 | 195/197 |
| <i>D8S272</i>   | 239     | 239       | 239/247 | <i>SHOX*</i>      | 153     | 153       | 151/153 |
| <i>D8S277</i>   | 171/177 | (167)/177 | 167/171 | <i>DXYS85*</i>    | 76      | 76        | 76      |
| <i>D8S264</i>   | 143/145 | 145       | 143/145 | <i>DXYS228*</i>   | 199     | 199       | 199     |
| <i>D9S1677</i>  | 240/242 | 242/(254) | 242/254 | <i>DXYS232*</i>   | 170     | 170       | 170     |
| <i>D9S167</i>   | 317/319 | 319       | 317/319 | <i>DXYS10091*</i> | 214     | 214       | 214     |
| <i>D9S1817</i>  | 288/296 | 296/(306) | 288/306 | <i>DXYS10083*</i> | 166/168 | 168       | 162/168 |
| <i>D9S157</i>   | 227/239 | 227/(239) | 239     | <i>DXYS10086*</i> | 170/184 | 170       | 170/172 |
| <i>D10S537</i>  | 155/157 | (155)/157 | 155     | <i>DXYS10096*</i> | 255/259 | 255       | 255     |
| <i>D10S249</i>  | 131/133 | (127)/131 | 127/133 | <i>DXYS233*</i>   | 164/168 | 168       | 168/170 |
| <i>D10S192</i>  | 251/257 | (253)/257 | 251/257 | <i>DXS1047</i>    | 161     | 161       | 161     |
| <i>D11S2071</i> | 188     | 188       | 184/188 | <i>DXS986</i>     | 246/258 | 246       | 246     |
| <i>D11S922</i>  | 116/120 | (90)/116  | 90/116  | <i>DXS1060</i>    | 169/175 | 169       | 175     |
| <i>D11S1318</i> | 140     | 140       | 140     | <i>DXS1226</i>    | 293/295 | 293       | 293     |
| <i>D11S4088</i> | 212/214 | 214       | 208/214 | <i>DXS8051</i>    | 113     | 113       | 113     |
| <i>D11S988</i>  | 117/125 | (115)/117 | 117/127 | <i>DXS1001</i>    | 200/204 | 204       | 200     |
| <i>D11S902</i>  | 145/147 | 145       | 145     | <i>DXS8055</i>    | 312/316 | 316       | 312     |
| <i>D11S904</i>  | 198     | (184)/198 | 184/198 | <i>DXS1073</i>    | 308     | 308       | 308     |
| <i>D11S1918</i> | 186/194 | (182)/186 | 182/194 | <i>DXS8091</i>    | 86      | 86        | 86      |
| <i>D11S4083</i> | 179/193 | 193       | 179/191 | <i>DXS990</i>     | 125/129 | 129       | 125     |
| <i>D11S4109</i> | 153/171 | 171       | 153/167 | <i>DXS987</i>     | 214/222 | 222       | 222     |
| <i>D11S901</i>  | 168     | (166)/168 | 166/168 | <i>DXS993</i>     | 270     | 270       | 270     |
| <i>D11S1356</i> | 191/217 | (205)/217 | 191/205 | <i>DXS1227</i>    | 81/83   | 83        | 83      |
| <i>D11S934</i>  | 177/181 | 181       | 181     | <i>DXS1068</i>    | 254/262 | 262       | 254     |
| <i>D11S912</i>  | 96/100  | 100       | 100     | <i>DXS1106</i>    | 130/132 | 130       | 132     |
| <i>D11S1304</i> | 175     | 175       | 175     | <i>DXS8043</i>    | 149/155 | 155       | 155     |
| <i>D11S968</i>  | 143     | 143       | 143     | <i>DXS991</i>     | 328/332 | 332       | 328     |
| <i>D12S345</i>  | 219/235 | 235       | 219/231 | <i>DXS1214</i>    | 287/293 | 287       | 287     |
| <i>D12S1617</i> | 252/254 | 254/(262) | 254/258 | <i>DXYS227†</i>   | 124     | 124       | 124     |
| <i>D12S99</i>   | 272     | 272/(274) | 272/286 | <i>DXYS154†</i>   | 244/248 | 244       | 244/246 |
| <i>D13S285</i>  | 93/103  | (95)/103  | 95/103  | <i>DXYS225†</i>   | 210/214 | 214       | 214     |

The Arabic numbers represent the sizes of the PCR products in bp.

The numbers in parentheses of the patient are minor peaks of non-maternal (paternal) origin.

\*Loci on the short arm pseudoautosomal region, and †those on the long arm pseudoautosomal region.

**Supplementary Figure 1.** FISH analysis of the *H19*-DMR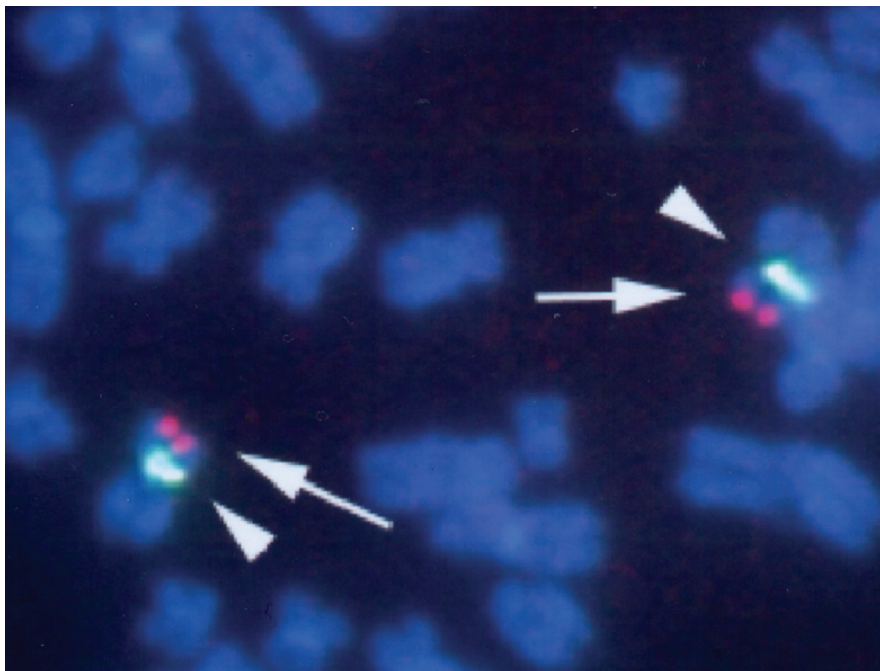

The RP5-998N23 has labeled with digoxigenin and detected by rhodamine anti-digoxigenin (red signals), and the control CEP 11 probe has been identified according to the manufacture's protocol (green signals).

**Supplementary Figure 2.** PCR analysis of Y-chromosomal loci

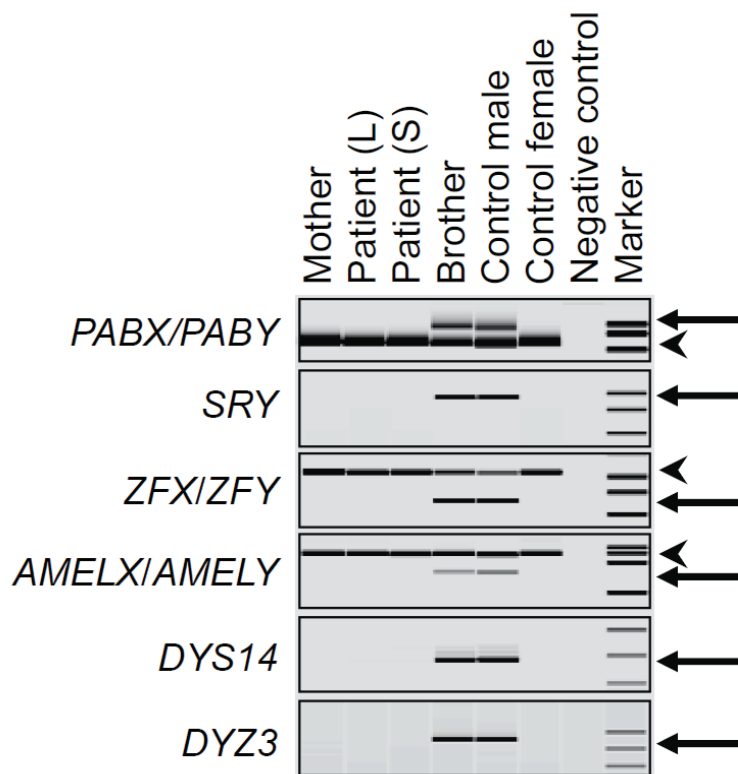

L: leukocytes; and S: salivary cells. No Y-specific bands (arrows) are identified whereas X-specific bands (arrowheads) are detected in both leukocytes and salivary cells of the patient.



**Supplementary Figure 3.** Quantitative RT-PCR plot in a control subject

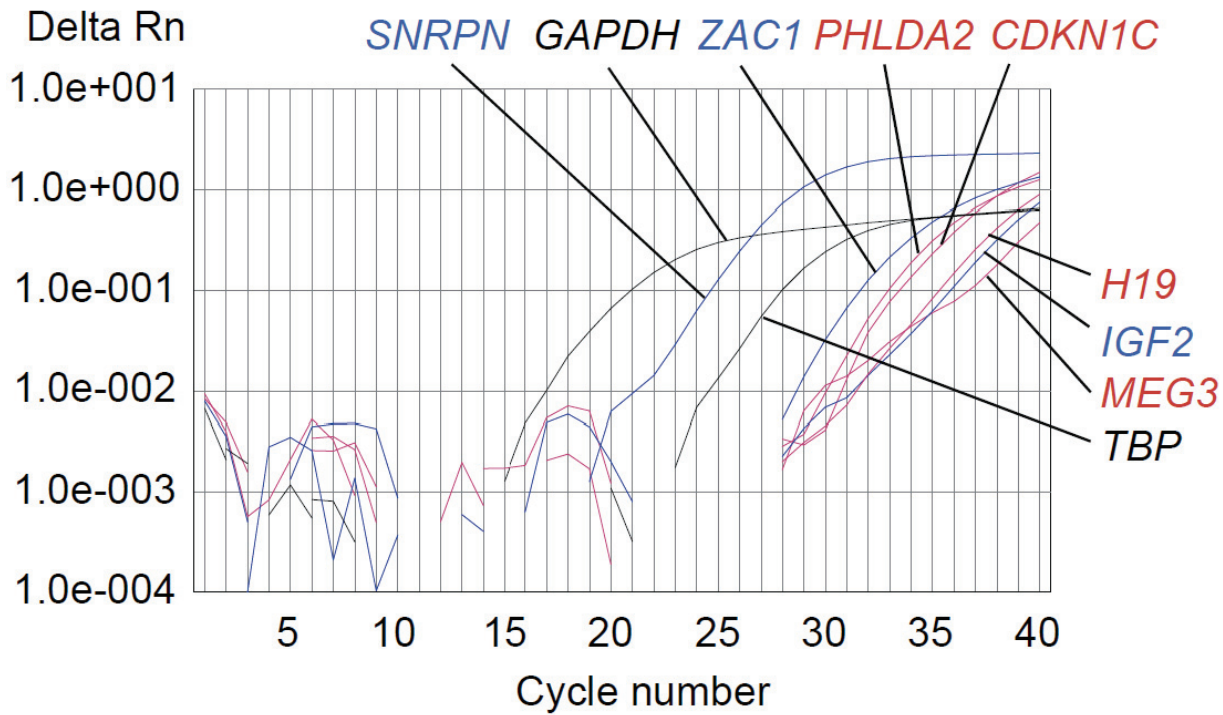

Paternally and maternally expressed genes are shown in blue and red, respectively.

## SUPPLEMENTARY NOTE

### Calculation of the ratio of cells with maternal uniparental isodisomy for all chromosomes (upid(AC)mat) in leukocytes and buccal epithelial cells

In this figure, two peaks are identified in the brother, and the area under curve (AUC) is larger for the short 184 bp peak than for the long 198 bp peak. This unequal amplification is consistent with short products being more easily amplified than long products. In the patient, the AUC ratio between the minor 184 bp peak of non-maternal origin and the major 198 bp peak of maternal origin is obtained as 0.09:1.0 for leukocytes (L) and 0.27:1.0 for salivary cells (S), after compensation of the unequal amplification between the two peaks, using the data in the brother.

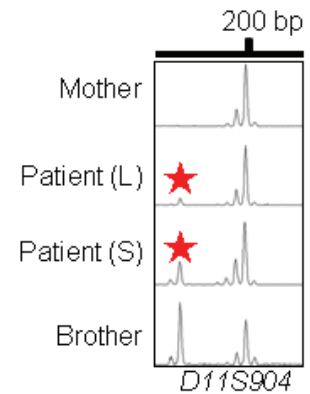

Here, let “X” represent the frequency of the 46,XX upid(AC)mat cells in leukocytes (thus,  $(1 - X)$  denotes the frequency of 45,X cells in leukocytes). Then, the non-maternally (paternally) derived 184 bp peak is generated by one paternally derived chromosome in the 45,X cells, i.e.,  $(1 - X)$ , and the maternally derived 198 bp peak is formed by the products from two maternally derived homologous chromosomes in the 46,XX upid(AC)mat cells and one maternally derived chromosome in the 45,X cells, i.e.,  $(2X + (1 - X)) = (X + 1)$ . Thus, the AUC ratio between the two peaks is represented as  $(1 - X):(X + 1) = 0.09:1.0$ , and “X” is obtained as 0.835 (83.5%). Similarly, when “Y” represents the frequency of the 46,XX upid(AC)mat cells in salivary cells, “Y” is obtained as 0.574 (57.4%). Furthermore, when “Z” represents the frequency of the 46,XX upid(AC)mat cells in buccal epithelium cells, “Z” is obtained as 0.183 (18.3%) on the basis of the assumption that salivary cells comprises 40% of buccal epithelium cells and 60% of leukocytes.

We performed such calculations for all the informative loci, and the mean frequency is determined as 84% in leukocytes, 56% in saliva cells, and 18% in epithelial buccal cells, as described in the main text.

**SUPPLEMENTARY REFERENCES**

1. Ikari K, Onda H, Furushima K, Maeda S, Harata S, Takeda J. Establishment of an optimized set of 406 microsatellite markers covering the whole genome for the Japanese population. *J Hum Genet* 2001;**46**:207–10.
2. Yamazawa K, Kagami M, Nagai T, Kondoh T, Onigata K, Maeyama K, Hasegawa T, Hasegawa Y, Yamazaki T, Mizuno S, Miyoshi Y, Miyagawa S, Horikawa R, Matsuoka K, Ogata T. Molecular and clinical findings and their correlations in Silver-Russell syndrome: implications for a positive role of IGF2 in growth determination and differential imprinting regulation of the IGF2-H19 domain in bodies and placentas. *J Mol Med* 2008;**86**:1171–81.
3. Yamazawa K, Kagami M, Ogawa M, Horikawa R, Ogata T. Placental hypoplasia in maternal uniparental disomy for chromosome 7. *Am J Med Genet Part A* 2008;**146A**:514–6.
4. Kamikihara T, Arima T, Kato K, Matsuda T, Kato H, Douchi T, Nagata Y, Nakao M, Wake N. Epigenetic silencing of the imprinted gene ZAC by DNA methylation is an early event in the progression of human ovarian cancer. *Int J Cancer* 2005;**115**:690–700.
5. Sasaki K, Soejima H, Higashimoto K, Yatsuki H, Ohashi H, Yakabe S, Joh K, Niikawa N, Mukai T. Japanese and North American/European patients with Beckwith-Wiedemann syndrome have different frequencies of some epigenetic and genetic alterations. *Eur J Hum Genet* 2007;**15**:1205–10.
6. Kobayashi H, Sato A, Otsu E, Hiura H, Tomatsu C, Utsunomiya T, Sasaki H, Yaegashi N, Arima T. Aberrant DNA methylation of imprinted loci in sperm from oligospermic patients. *Hum Mol Genet* 2007;**16**:2542–51.
7. El-Maarri O, Seoud M, Coullin P, Herbiniaux U, Oldenburg J, Rouleau G, Slim R. Maternal alleles acquiring paternal methylation patterns in biparental complete hydatidiform moles. *Hum Mol Genet* 2003;**12**:1405–13.
